# Supplementary material
Source: publisher figshare collection journal article supplement (https://acs.figshare.com/ndownloader/files/4774246)
Supplement: Supplementary file 1 [file 4774246]

## Supporting Information

### Size-dependent Carrier Dynamics in CdS Nanoparticles by Femtosecond Visible-pump/IR-probe Measurements

Ichizo YAGI,<sup>1,2,3</sup> Kensuke MIKAMI,<sup>1</sup> Kojiro EBINA,<sup>1</sup> Masayuki OKAMURA<sup>1</sup> and Kohei UOSAKI<sup>1,\*</sup>

<sup>1</sup>*Physical Chemistry Laboratory, Division of Chemistry, Graduate School of Science, Hokkaido University, N10W8 Kita-ku, Sapporo 060-0810, Japan*

<sup>2</sup>*PRESTO, Japan Science and Technology Agency (JST), Kawaguchi 332-0012, Japan*

<sup>3</sup>*FC-Cubic, AIST, 2-41-6 Aomi, Koto-ku, Tokyo 135-0064, Japan*

#### Results and Discussion Section:

Figure 1S shows an FT-IR spectrum of the as-prepared CdS nanocluster dispersions in n-heptane ( $W = 8$ ). A broad peak around  $3500\text{ cm}^{-1}$  is assigned to be due to O-H stretching vibration of water. The FT-IR spectra of the reversed micelle dispersion containing (a)  $\text{Cd}^{2+}$  and (b)  $\text{S}^{2-}$  were also measured. The intensity and shape of the O-H stretching peak of the three spectra were identical. These results indicate that the structure of water in the reverse micelle of  $\text{Cd}^{2+}$  and  $\text{S}^{2-}$  was maintained even after the formation of CdS nanoparticles, i.e., water remained in the reversed micelle and no phase separation of water from n-heptane occurred after the formation of CdS nanoparticles.

The schematic structural model of CdS nanoparticles based on the above discussions is shown in Figure 2S.

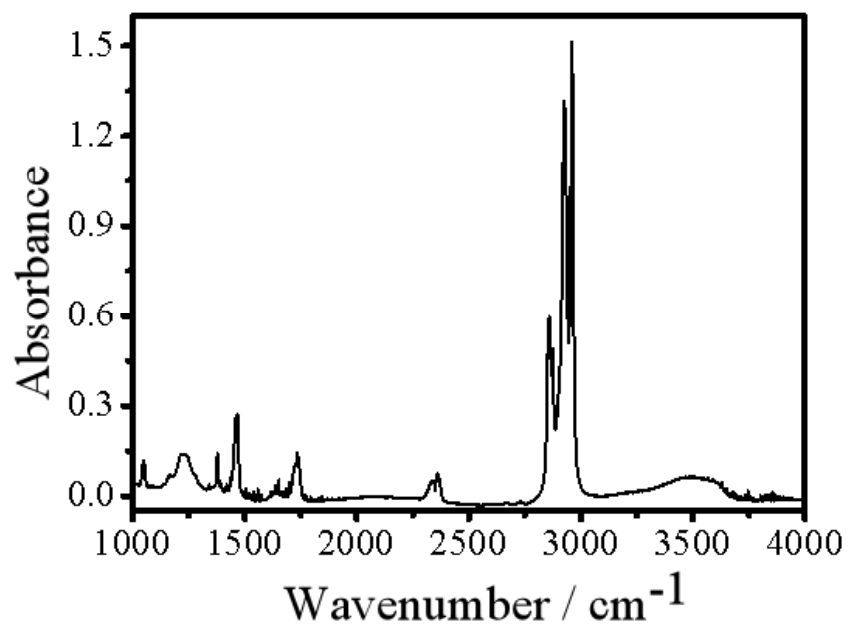

**Figure 1S.** Transmission FT-IR spectrum (optical path length is ca. 20  $\mu\text{m}$ ) of dispersion of CdS nanoparticle prepared by reversed micelle method ( $W = 8$ ).

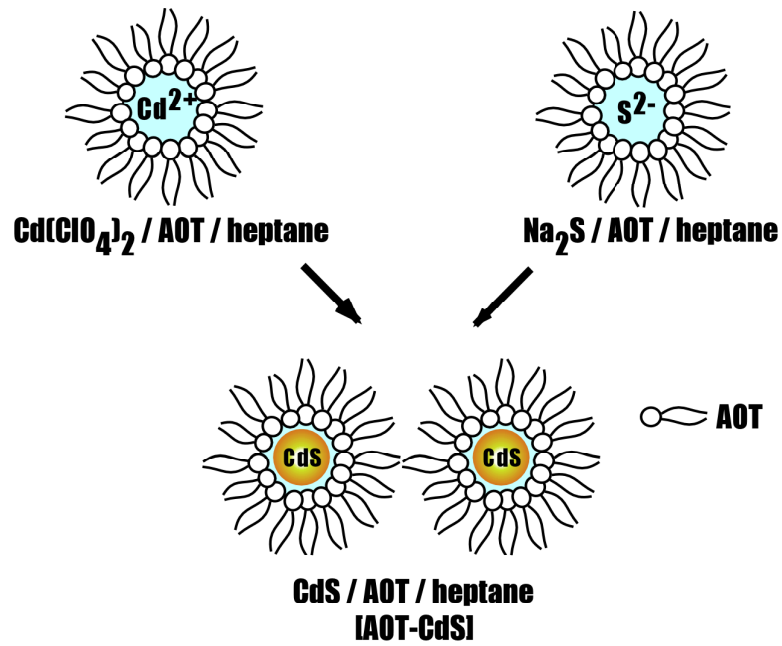

**Figure 2S.** Scheme of preparation of CdS nanoparticles in AOT/n-heptane reversed micelle.
